# Supplementary material for: Raman Spectroscopy and Surface Enhanced Raman Scattering (SERS) for the Analysis of Blue and Black Writing Inks: Identification of Dye Content and Degradation Processes
Source: PubMed Central journal article supplement (PMC6823613; doi:10.3389/fchem.2019.00727), 2019-10-25
Supplement: Presentation_1.pdf [file Presentation_1.pdf]

## Supporting Information

### Raman Spectroscopy and Surface Enhanced Raman Scattering

#### (SERS) for the Analysis of Blue and Black Writing Inks:

#### Identification of Dye Content and Degradation Processes

Daniela Saviello,<sup>a</sup> Maddalena Trabace,<sup>b</sup> Abeer Alyami,<sup>a</sup> Antonio Mirabile,<sup>c</sup> Piero Baglioni,<sup>b</sup>  
Rodorico Giorgi,<sup>b</sup> Daniela Iacopino<sup>a\*</sup>

<sup>a</sup>Tyndall National Institute, University College Cork, Nanotechnology group, Dyke Parade,  
Cork, Ireland

<sup>b</sup>Department of Chemistry & CSGI, University of Florence, Italy

<sup>c</sup>Mirabile, 11 Rue de Bellefond, 75009 Paris 09, France

Corresponding author email: [daniela.iacopino@tyndall.ie](mailto:daniela.iacopino@tyndall.ie)

#### Details of analyzed commercial inks

Figure S1a shows a table with detailed names and colors of the eight commercial pen inks analyzed in this work. Figure 1b-f show white light optical microscopy images of pen lines drawn on commercial Fabriano paper with some of the analyzed pens. All images show blue and black coloration arising from deep pen ink penetration into the paper fibers.

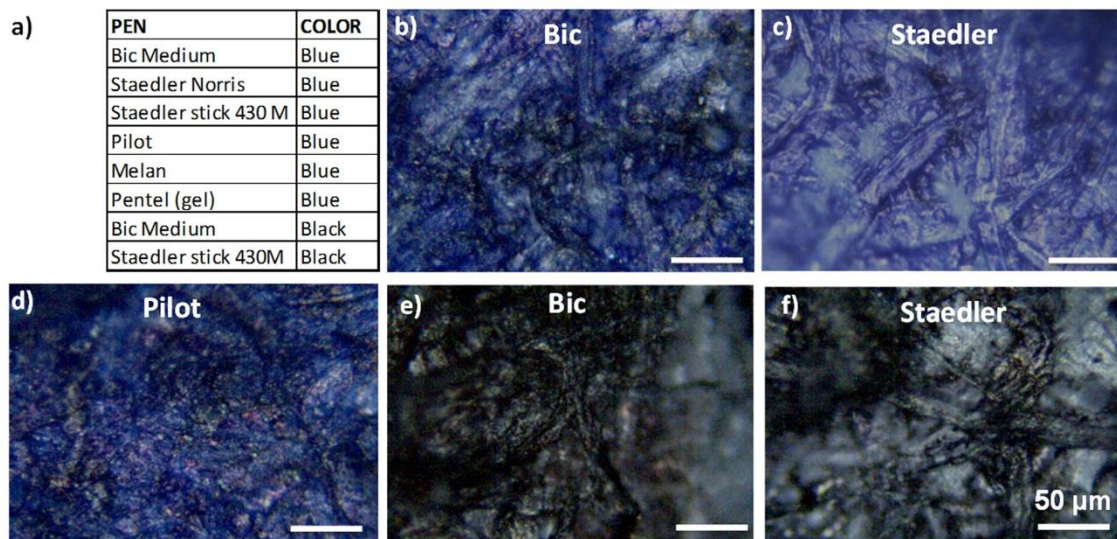

**Figure S1:** a) List of writing inks analyzed in this work. White light optical microscopy images of ink strokes on Fabriano paper realized with the following pens: a) blue Bic, b) blue Staedler Norris, c) blue Pilot, d) black Bic and f) black Staedler Norris. Scale bar 50  $\mu\text{m}$  for all optical images.

### Raman and SERS spectra of blank paper

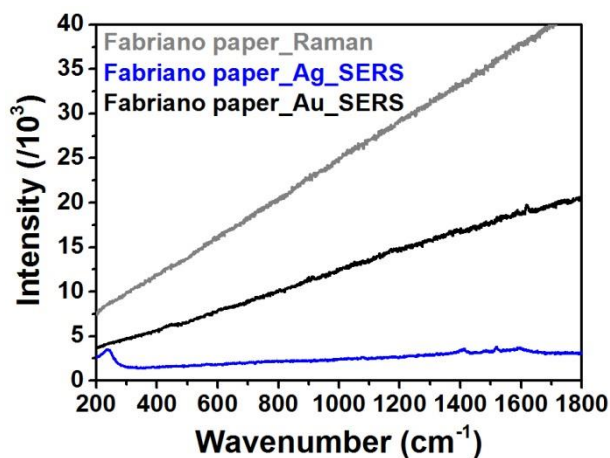

**Figure S2.** Raman and SERS spectra of commercial Fabriano paper

### SERS analysis of analyzed writing inks

**Table S1.** List of band positions found in SERS spectra of analyzed inks.

| SERS Ag nanopaste (cm <sup>-1</sup> ) |               |            |           |               | SERS Au nanopaste (cm <sup>-1</sup> ) |               |            |           |               |
|---------------------------------------|---------------|------------|-----------|---------------|---------------------------------------|---------------|------------|-----------|---------------|
| Blue Bic                              | Blue Staedler | Blue Pilot | Black Bic | Black Stadler | Blue Bic                              | Blue Staedler | Blue Pilot | Black Bic | Black Stadler |
| 1620                                  | 1620          | 1614       | 1620      | 1620          | 1618                                  | 1622          | 1614       | 1619      | 1623          |
| 1588                                  | 1587          | 1583       | 1589      | 1588          | 1587                                  | 1591          | 1583       | 1589      | 1586          |
| 1534                                  | 1536          | 1528       | 1534      | 1536          | 1536                                  | 1387          | 1528       | 1537      | 1538          |
| 1482                                  | 1479          | 1359       | 1478      | 1479          | 1389                                  | 1367          | 1359       | 1391      | 1390          |
| 1440                                  | 1446          | 1168       | 1443      | 1443          | 1367                                  | 1173          | 1168       | 1177      | 1372          |
| 1392                                  | 1389          | 1105       | 1388      | 1388          | 1298                                  | 913           | 1105       | 1139      | 1295          |
| 1371                                  | 1371          | 936        | 1370      | 1373          | 1169                                  |               | 936        | 912       | 1179          |
| 1294                                  | 1294          | 912        | 1298      | 1295          | 914                                   |               | 912        | 439       | 912           |
| 1175                                  | 1180          | 756        | 1179      | 1179          | 803                                   |               | 756        | 423       | 805           |
| 943                                   | 941           | 595        | 989       | 986           | 724                                   |               | 595        |           | 442           |
| 916                                   | 911           | 438        | 941       | 942           | 441                                   |               | 438        |           | 422           |
| 806                                   | 809           | 419        | 915       | 912           | 425                                   |               | 419        |           |               |
| 760                                   | 759           |            | 806       | 810           |                                       |               |            |           |               |
| 727                                   | 730           |            | 763       | 763           |                                       |               |            |           |               |
| 565                                   | 572           |            | 733       | 731           |                                       |               |            |           |               |
| 526                                   | 529           |            | 566       | 569           |                                       |               |            |           |               |
| 443                                   | 444           |            | 526       | 526           |                                       |               |            |           |               |
| 421                                   | 420           |            | 441       | 442           |                                       |               |            |           |               |
| 337                                   | 339           |            | 421       | 420           |                                       |               |            |           |               |
|                                       |               |            | 341       | 342           |                                       |               |            |           |               |

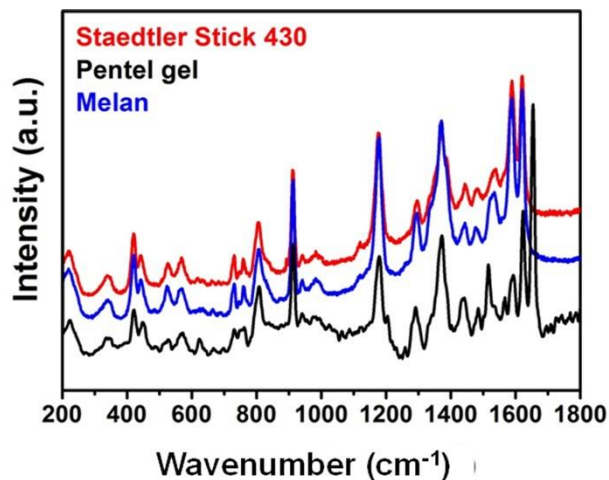

**Figure S3.** SERS spectra of blue pens: Staedler stick 430, Melan and gel pen Pentan obtained with 514 nm illumination wavelength.

Figure S3 shows SERS spectra of other analyzed pen inks obtained by deposition of Ag nanopaste on ink-colored paper. Staedler stick 430 and Melan pens showed nearly overlapping spectra with peaks centered at 1621, 1587, 1532, 1489, 1442, 1369, 1293, 1178,

911, 804, 759, 728 570, 523, 441 and 419  $\text{cm}^{-1}$ , close to the peaks obtained for Staedler Norris pen shown in Figure 3 on the main manuscript. This suggests a chemical composition with presence of triarylmethane dyes. In contrast, peaks in different locations were observed for the Pentel gel pen, especially above 1400  $\text{cm}^{-1}$  with bands centered at 1652, 1624, 1590, 1566 and 1514  $\text{cm}^{-1}$  revealing presence of Euroglaucine and a red component, likely Rodhamine B.

### **SERS spectra of analyzed writing inks at 785 nm illumination wavelength**

Writing inks were also analyzed with 785 nm illumination wavelength in order to investigate possible components not Raman active at 514 nm. SERS effect was obtained by deposition of Au nanopaste on the colored paper line. The SERS spectrum of blue Bic writing ink (Figure S4a) showed bands at 1537, 1338 and 719  $\text{cm}^{-1}$  all attributable to phthalocyanine dye. The SERS spectrum of Staedler ink showed bands diagnostic of tryarylmethene dyes at 1619, 1595, 1374, 1180 and 916  $\text{cm}^{-1}$ . In order to get more insights into the chemical composition of blue Pilot pen SERS spectra were also measured with Au nanopaste at 514 and 785 nm illumination wavelengths (Figure S4c). Bands of different intensities were obtained with higher intensity spectra recorded at 514 nm compared to 785 nm suggesting that a molecular resonance effect (SERRS) was into play at 514 nm and had a stronger effect than the plasmonic effect into play at 785 nm. The absence of additional bands at 785 nm suggests lack on phthalocyanine dyes or pigments in the chemical composition of this ink. Formulas of identified dyes are reported in Figure S5 for reference.

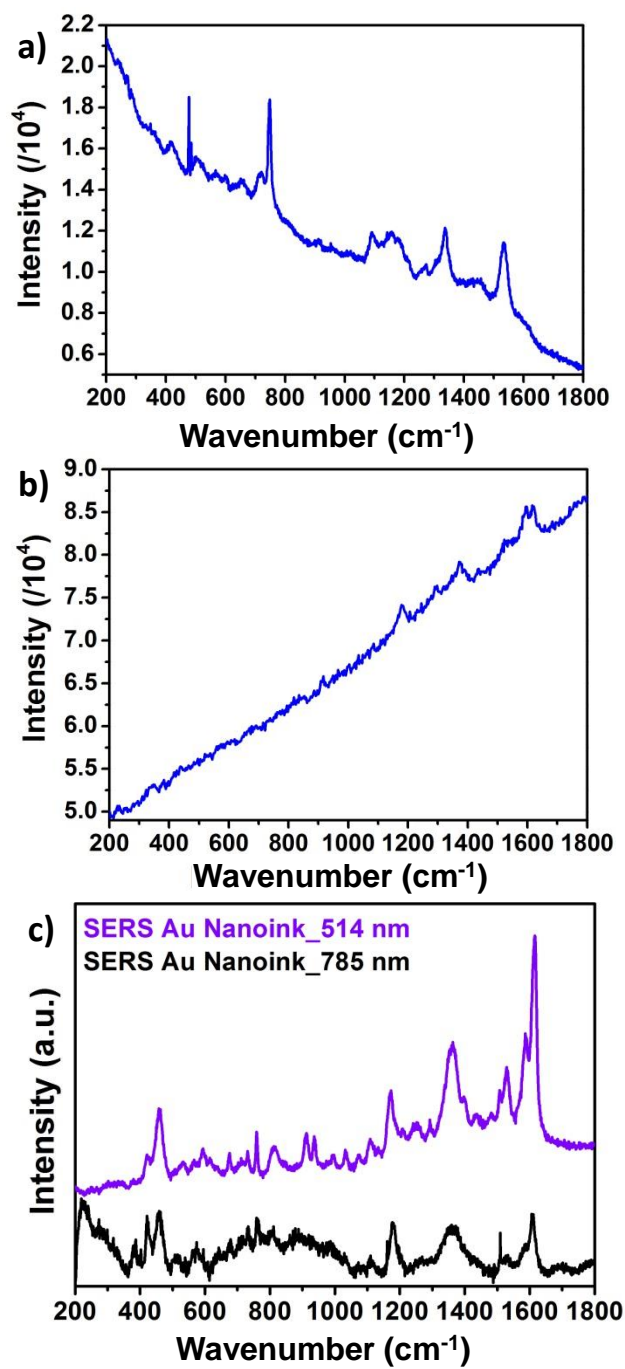

**Figure S4.** SERS spectra of blue writing inks obtained with Au nanopaste: a) Bic, b),Staedler, c) Pilot pen obtained with illumination at 514 nm (purple line) and 785 nm (black line).

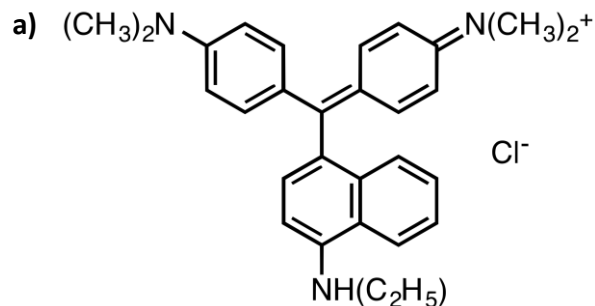

**Victoria Blue R**

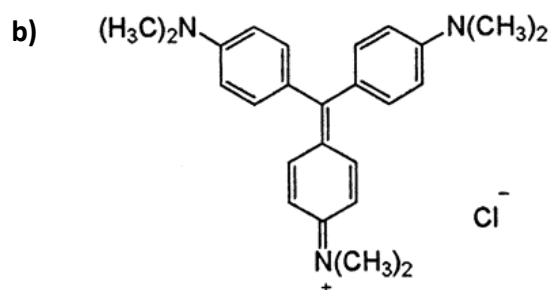

**Crystal Violet**

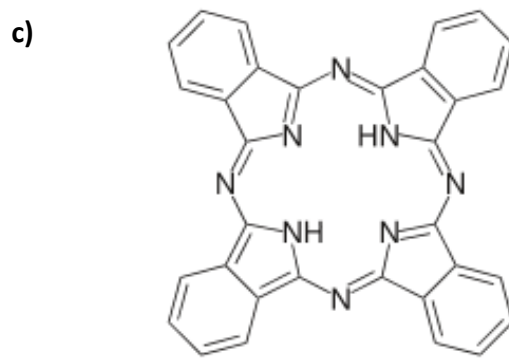

**Phthalocyanine**

**Figure S5.** Chemical structure of dyes identified in investigated writing ink mixtures.

### **Thin Layer Chromatography (TLC) analysis**

The separation of the dye components in blue writing inks was achieved by TLC. By using an ethylacetate-ethanol-water eluent (70:35:30 v/v) blue and purple spots formed for Bic and Staedler pens whereas only blue spots formed for the Pilot pen. Purple spots of Bic and Staedler pens showed retention factors ( $R_f$ ) equal to 0.51. Blue spots with higher  $R_f$  showed in the TLC of Staedler, suggesting the presence of additional blue dyes in the ink mixture.

Pilot pen main blue spot showed an  $R_f$  of 0.37. For comparison, reference dye Crystal Violet was deposited on another TLC which was run in parallel with the ink TLC.

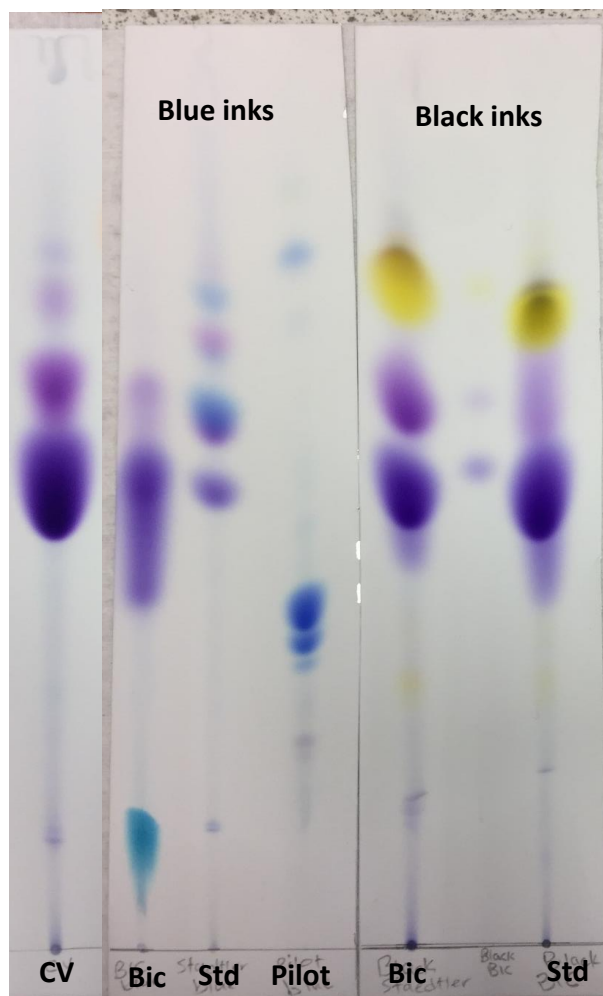

**Figure S6.** Photograph of three TLC plates showing blue Bic, Staedler and Pilot inks and black Bic and Stadler inks against reference dye Crystal Violet.

Deposited CV displayed  $R_f$  equal to = 0.51, equivalent to the  $R_f$  of the Bic and Staedler purple spots, respectively. Purple spots in black Bic and Staedler inks also showed  $R_f$  = 0.51, corresponding to the presence of CV. Unidentified Yellow spots also formed at higher  $R_f$  = 0.71.
